# Supplementary material for: Highly luminescent YAG:Ce ultra-small nanocrystals, from stable dispersions to thin films
Source: Royal Society of Chemistry journal article supplement (doi:10.1039/c7tc03504g), 2017-01-01
Supplement: c7tc03504g1.pdf [file c7tc03504g1.pdf]

## Supporting Information

Highly luminescent YAG:Ce ultra-small nanocrystals, from stable dispersions to thin films.

Mateusz Odziomek,<sup>a,b</sup> Frederic Chaput,<sup>\*a</sup> Frederic Lerouge,<sup>a</sup> Maciej Sitarz,<sup>b</sup> and Stephane Parola<sup>\*a</sup>

<sup>a</sup>Université de Lyon, Ecole Normale Supérieure de Lyon, CNRS UMR 5182, Université Lyon 1,  
Laboratoire de Chimie, 46 allée d'Italie, F69364, Lyon, France.

<sup>b</sup>AGH University of Science and Technology, Faculty of Materials Science and Ceramics,  
Department of Chemistry of Silicates and Macromolecules, al. A. Mickiewicza 30, 30-059  
Krakow, Poland

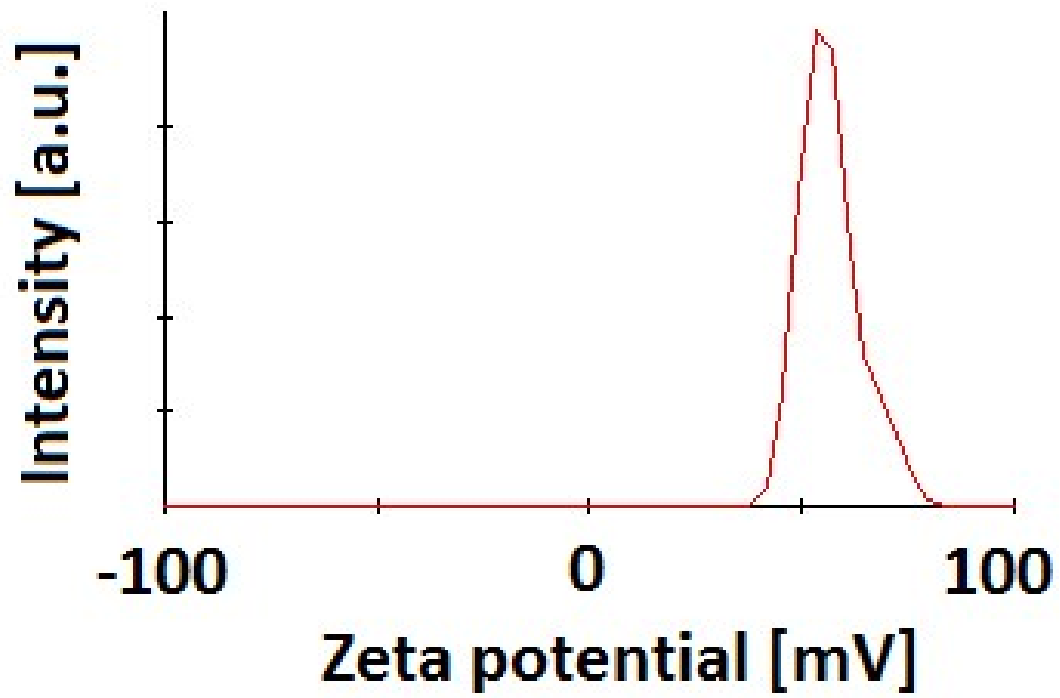

**Fig. S1** Zeta potential measured on the YAG colloidal solution prepared from YAG nanocrystals in water after purification and dialysis (pH=7,2).

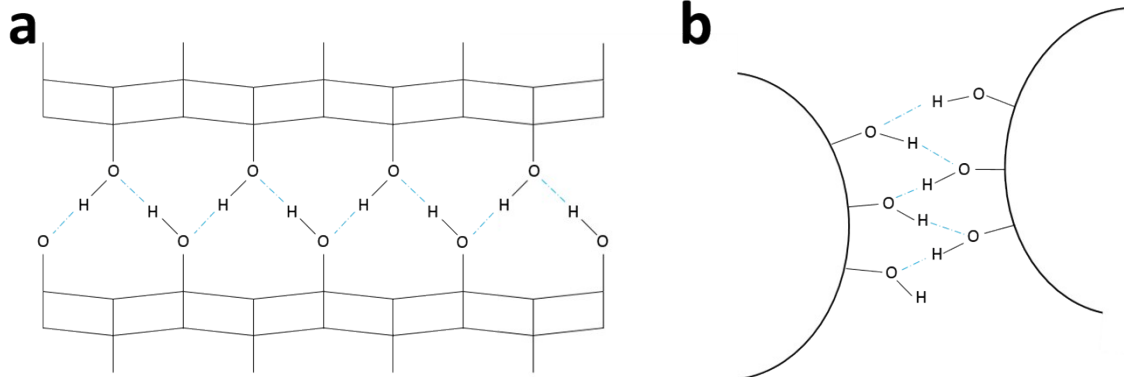

**Fig. S2** Schematic picture of: **a)** hydrogen bonding between boehmite layers and **b)** speculative hydrogen bonding between aggregating particles.

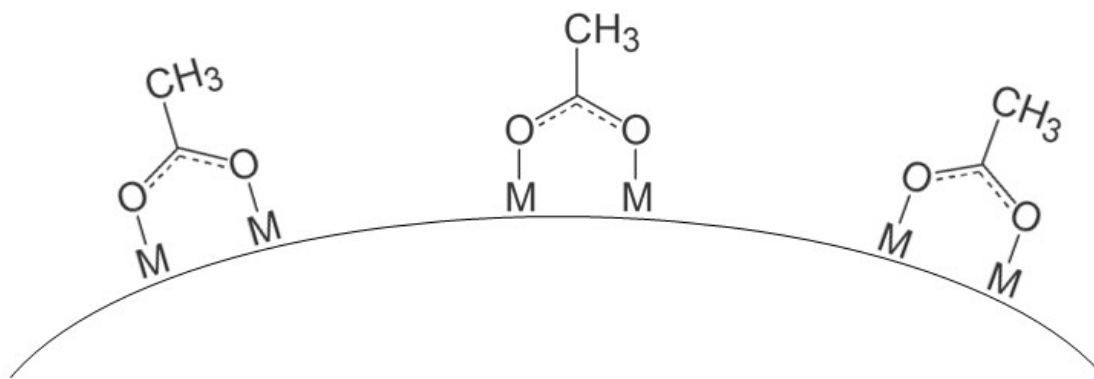

**Fig. S3** Schematic picture of bridging bidentate mode of acetates on the surface of YAG. M represents cation of most likely aluminium, but yttrium is also possible.

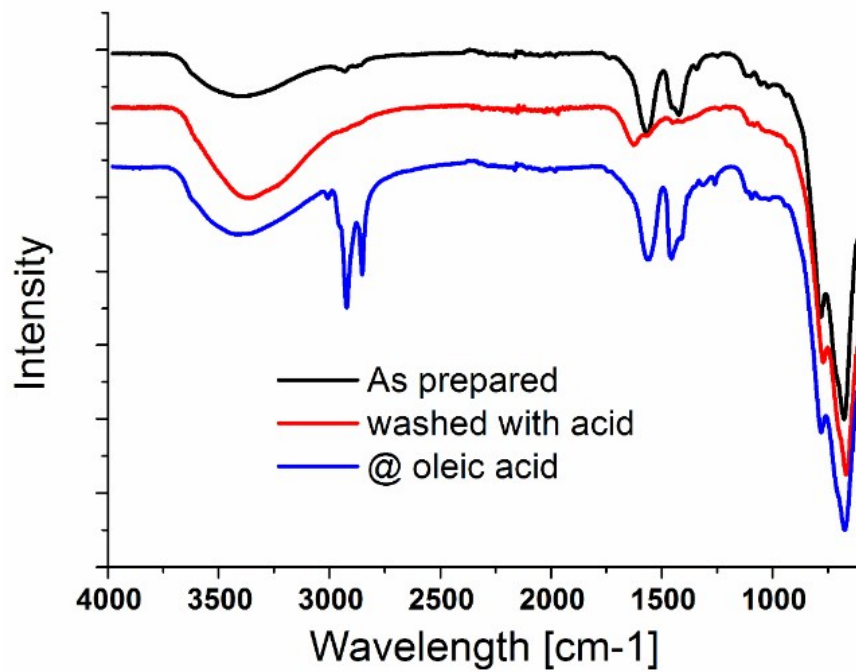

**Fig. S4** FTIR spectra of: YAG as prepared from the mixture of 1,4-BD and DEG in anhydrous conditions (black); washed with acidic water (red); washed with acid and covered with oleic acid (blue)

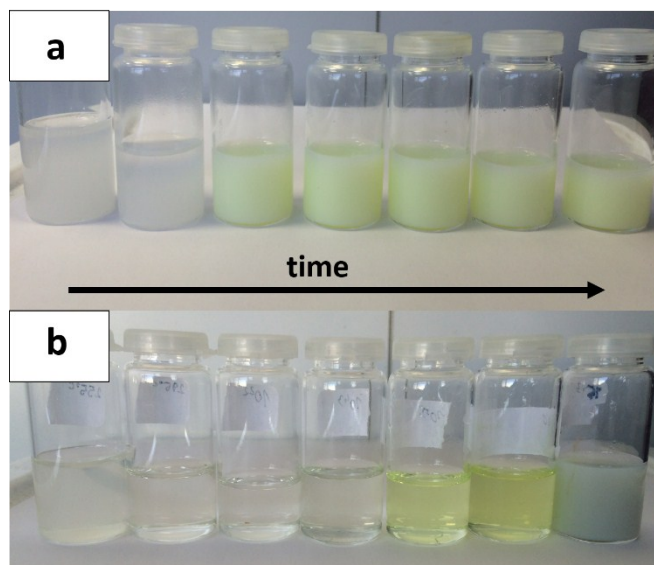

**Fig. S5** Comparison of reaction mixture aspect evolution within time. A) YAG prepared in neat 1,4-BD and b) with DEG and dehydrated precursors. Yellowish colour of colloids appeared when crystalline YAG phase was present. After 4,5h of heat treatment in the mixture of 1,4-BD and DEG, colloid turned greyish – bluish, due to the decomposition of DEG.

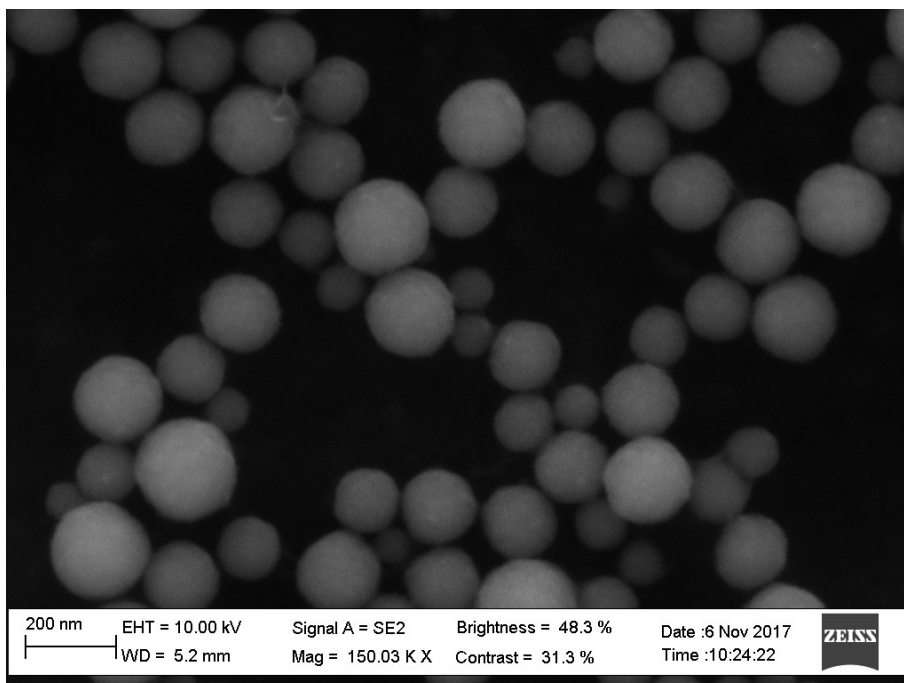

**Fig. S6** SEM image of YAG:Ce NPs denoted as DEG7W. Clearly, higher amount of water increased the size of NPs.

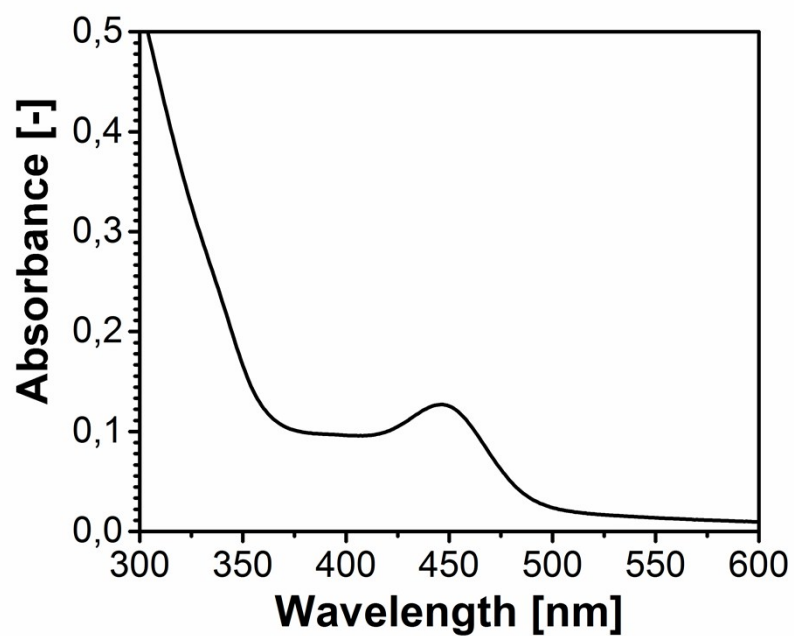

**Fig. S7** UV-VIS spectrum of 15% colloidal solution of YAG:Ce (0,4 at%) prepared with DEG as co-solvent and dehydrated precursors.



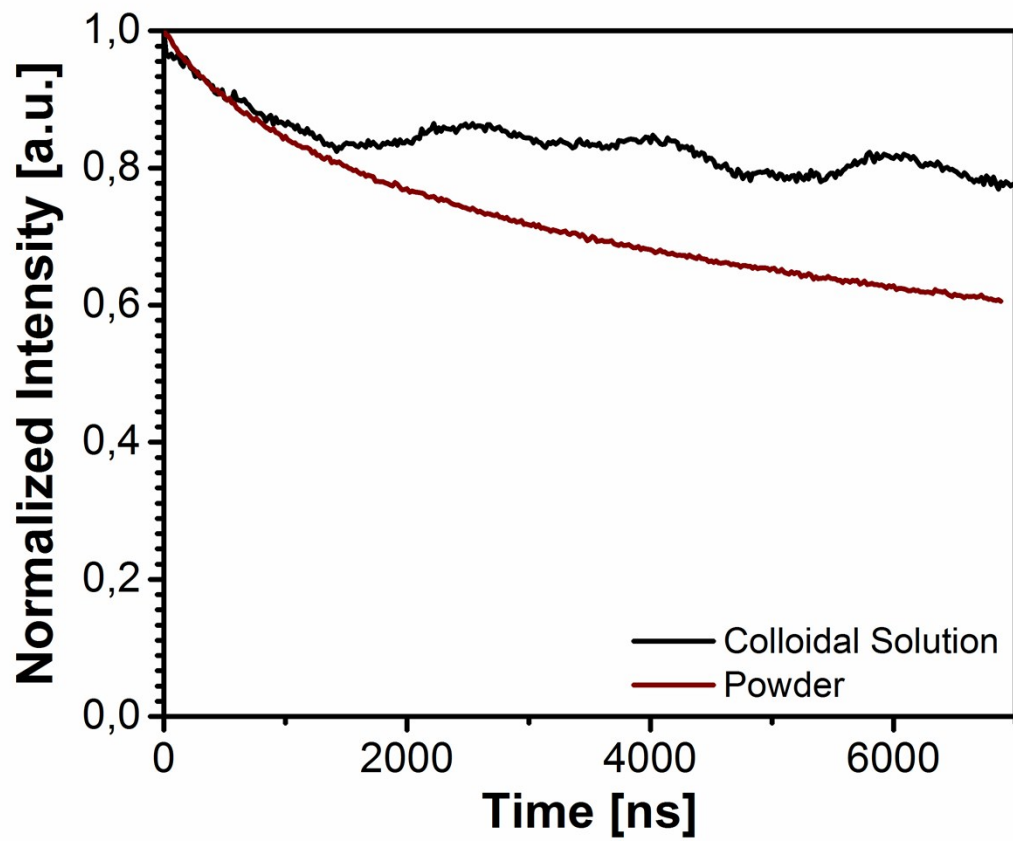

**Fig. S8** Photostability of YAG:Ce (0,4% Ce) in the form of powder and as obtained colloidal solution (5% wt.)
